# Supplementary material
Source: PubMed Central journal article supplement (PMC8406860)
Supplement: sjab274_suppl_Supplementary_Appendix.pdf [file sjab274_suppl_Supplementary_Appendix.pdf]

# Video Chat Technologies and Attitudes towards Aesthetic Surgery

---

## Start of Block: Intro

Q97 This study will consist of a survey created via Qualtrics and administered via Amazon mTurk. In the following survey, you will answer several questions related to your video chat technology usage. You will also be asked to complete questions regarding your opinions on aesthetic surgery. There is no right or wrong answer. This survey will take approximately 5-7 minutes to complete. Please DO NOT take this survey if you are under the age of 18 or if English is not your primary language. All responses will be recorded confidentially and stored securely. Your taking part in this study is completely voluntary. Your completion of the survey will serve as your consent to be in this research study. Upon analyzing the data, all identifying information will be removed and the data will be analyzed in aggregate to further protect the privacy of your responses. Please contact [jchen250@jhmi.edu](mailto:jchen250@jhmi.edu) if you have any questions or concerns. We sincerely appreciate your participation! Study principal investigator: Kristen Broderick ([kbroder4@jhmi.edu](mailto:kbroder4@jhmi.edu)); IRB00271633

## End of Block: Intro

---

## Start of Block: Background

Q98 The following survey is about **video chat technologies** including platforms for video conferencing (Zoom, Cisco Webex, etc.) and video chatting (FaceTime, Facebook messenger video).

---

Q99 Do you currently use any video chat technologies?

- Yes (1)
- No (2)

## End of Block: Background

---

## Start of Block: Video Use

Q87

Since the start of the COVID-19 pandemic...

hoursaday

How many hours a day on average do you use video chat technologies for the following applications (work, school, etc.)? (Please set slider to 0 if you do not use video technology for this application)

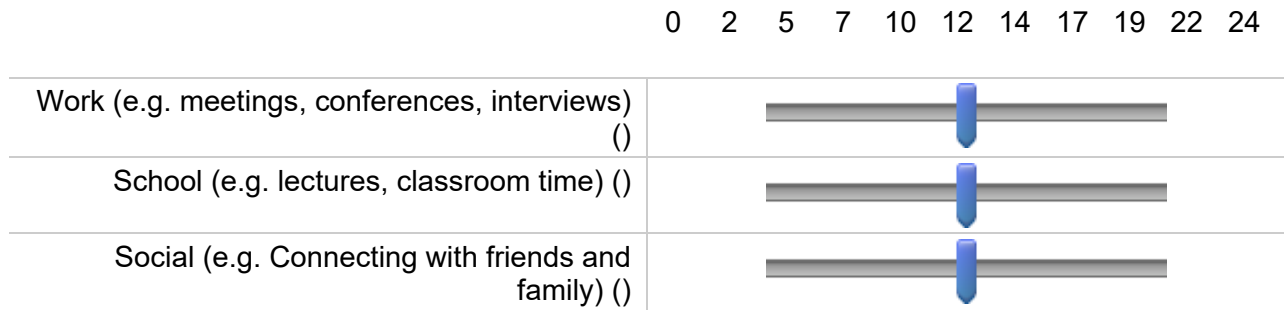

Display This Question:

If How many hours a day on average do you use video chat technologies for the following applications... [ Work (e.g. meetings, conferences, interviews) ] != 0

workevents Since the start of the pandemic, how many video chat events do you participate in for **work** on average in a day?

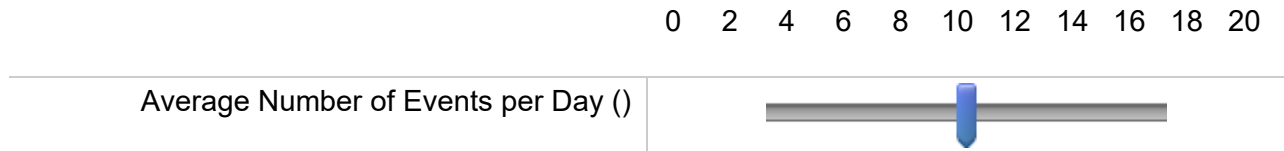

Display This Question:

If How many hours a day on average do you use video chat technologies for the following applications... [ School (e.g. lectures, classroom time) ] != 0

schoolevents Since the start of the pandemic, how many video chat events do you participate in for **school** on average in a day?

0 2 4 6 8 10 12 14 16 18 20

Average Number of Events per Day ()

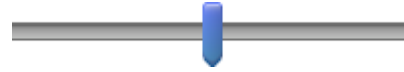

*Display This Question:*

*If How many hours a day on average do you use video chat technologies for the following applications... [ Social (e.g. Connecting with friends and family) ] != 0*

socialevents Since the start of the pandemic, how many video chat events do you participate in for social events on average in a day?

0 2 4 6 8 10 12 14 16 18 20

Average Number of Events per Day ()

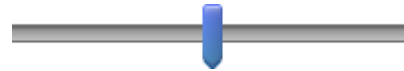

Page Break

Q92 Since the start of the COVID-19 pandemic...

---

hoursonplatform On average, how many **hours per day** do you typically spend on the following video chat platforms? (Please set slider to 0 if you do NOT use the platform)

I don't use this platform

0 2 5 7 10 12 14 17 19 22 24

|                             |                                                                                      |
|-----------------------------|--------------------------------------------------------------------------------------|
| Zoom ()                     |    |
| FaceTime ()                 |    |
| Facebook Messenger Video () |    |
| Facebook Rooms ()           |    |
| Cisco Webex ()              |    |
| Skype ()                    |    |
| Microsoft Teams ()          |    |
| Discord Video ()            |    |
| Google Hangouts ()          |    |
| Google Meet ()              |   |
| Google Duo ()               |  |
| Houseparty ()               |  |
| WeChat Video Call ()        |  |
| WhatsApp Video Call ()      |  |
| LINE Video Call ()          |  |
| KakaoTalk Video Call ()     |  |
| Please set slider to +12 () |  |
| Other: Please specify ()    |  |

-----  
Page Break

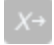

enhancement Do you use any of the following features to enhance images of yourself on video chat platforms? (Please select **ALL** that apply)

- Video lighting filter (12)
  - Green screen background (27)
  - Video image face filter (e.g. Memoji camera effects, makeup filter, accessory filter) (26)
  - LED/ring light (22)
  - Laptop stand (23)
  - Tripod (24)
  - External camera (25)
  - Other (please specify) (13)
- 
- I DO NOT use of these features (14)

percentenhanced What percentage of your total video call time a day involves the use of virtual photo editing features (lighting filter, face filter)?

0 10 20 30 40 50 60 70 80 90 100

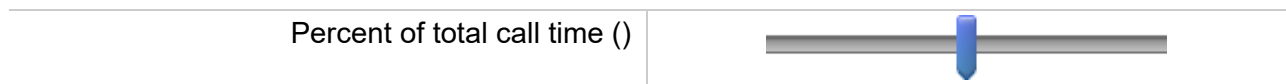

percentbackground What percentage of your total video call time a day involves the use of green screen backgrounds?

0 10 20 30 40 50 60 70 80 90 100

Percent of total call time ()

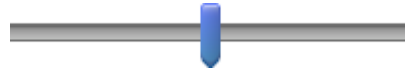

Q124 What percentage of your total video call time a day involves the use of external devices (e.g. tripod, external camera, LED/ring light)?

0 10 20 30 40 50 60 70 80 90 100

Percent of total call time ()

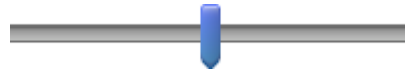

ownface What percentage of your total video call time a day do you spend on average looking at your own face?

0 10 20 30 40 50 60 70 80 90 100

Percent of total call time ()

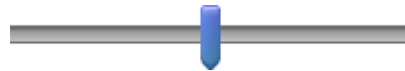

anotherface What percentage of your total video call time a day do you spend on average looking at another person's face?

0 10 20 30 40 50 60 70 80 90 100

Percent of total call time ()

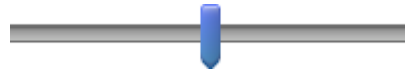

Page Break

Q115 How much **more or less** aware of your appearance do you feel since the start of the pandemic? +5 = **a lot more**, -5 = **a lot less**

no more/less

-5 -4 -3 -2 -1 0 1 2 3 4 5

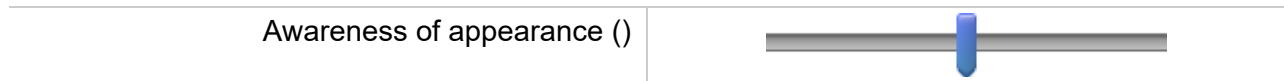

Q119 How much **more or less** have you considered getting cosmetic surgery as a direct result of seeing yourself on video? +5 = a lot more, -5 = a lot less

no more/less

-5 -4 -3 -2 -1 0 1 2 3 4 5

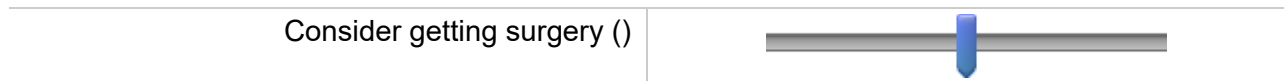

End of Block: Video Use

Start of Block: Occupation

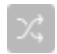

Q123 Which statement best describes your current employment status?

- Employed, working 40+ hours a week (1)
- Employed, working 1-39 hours a week (2)
- Not employed, looking for work (3)
- Not employed, retired (5)
- Not employed, disabled (6)
- Not employed (other) (7) \_\_\_\_\_



Display This Question:

If Which statement best describes your current employment status? = Employed, working 40+ hours a week

Or Which statement best describes your current employment status? = Employed, working 1-39 hours a week

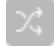

Q130 Where are you employed?

- PRIVATE-FOR-PROFIT company, business or individual, for wages, salary or commissions (1)
- PRIVATE-NOT-FOR-PROFIT, tax-exempt, or charitable organization (2)
- Local GOVERNMENT employee (city, county, etc.) (3)
- State GOVERNMENT employee; 5-Federal GOVERNMENT employee (4)
- Federal GOVERNMENT employee (5)
- SELF-EMPLOYED in own NOT INCORPORATED business, professional practice, or farm (6)
- SELF-EMPLOYED in own INCORPORATED business, professional practice, or farm (7)
- Working WITHOUT PAY in family business or farm (8)

---

Display This Question:

If Which statement best describes your current employment status? = Employed, working 40+ hours a week

Or Which statement best describes your current employment status? = Employed, working 1-39 hours a week

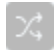

Q126 Which of the following industries most closely matches the one in which you are employed?

- Forestry, fishing, hunting or agriculture support (1)
  - Real estate or rental and leasing (2)
  - Mining (3)
  - Professional, scientific or technical services (4)
  - Utilities (5)
  - Management of companies or enterprises (6)
  - Construction (7)
  - Admin, support, waste management or remediation services (8)
  - Manufacturing (9)
  - Educational services (10)
  - Wholesale trade (11)
  - Health care (12)
  - Retail trade (13)
  - Arts, entertainment or recreation (14)
  - Transportation or warehousing (15)
  - Accommodation or food services (16)
  - Information (17)
  - Finance or insurance (19)
  - Other (18) \_\_\_\_\_
-

Display This Question:

If Which statement best describes your current employment status? = Employed, working 40+ hours a week

Or Which statement best describes your current employment status? = Employed, working 1-39 hours a week

Q112 Prior to the COVID-19 pandemic, how many hours a day did your occupation involve virtual video meeting time?

0 2 5 7 10 12 14 17 19 22 24

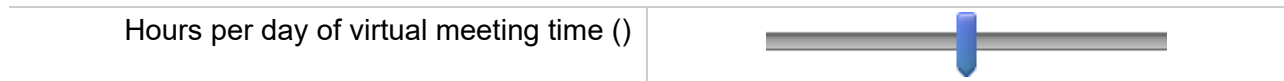

End of Block: Occupation

Start of Block: Social Media Use During COVID

Q126 On average, how many hours per day do you typically spend altogether on social media platforms (i.e. Facebook, Twitter, Instagram, etc.)?

0 2 5 7 10 12 14 17 19 22 24

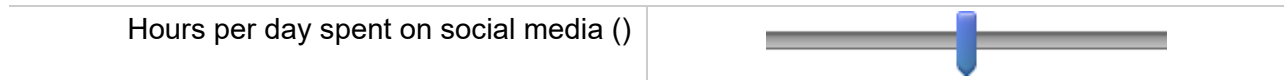

End of Block: Social Media Use During COVID

Start of Block: Acceptance of Cometic Surgery

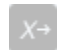

acs

|                                                                                                                       | Strongly disagree (1) | Disagree (2)          | Somewhat disagree (3) | Neutral (4)           | Somewhat agree (5)    | Agree (6)             | Strongly agree (7)    |
|-----------------------------------------------------------------------------------------------------------------------|-----------------------|-----------------------|-----------------------|-----------------------|-----------------------|-----------------------|-----------------------|
| 1. It makes sense to have minor cosmetic surgery rather than spending years feeling bad about the way you look (ACS1) | <input type="radio"/> |
| 2. Cosmetic surgery is a good thing because it can help people feel better about themselves (ACS2)                    | <input type="radio"/> |
| 3. In the future, I could end up having some kind of cosmetic surgery (ACS3)                                          | <input type="radio"/> |
| 4. People who are very unhappy with their physical appearance should consider cosmetic surgery as one option          | <input type="radio"/> |

(ACS4)

5. If cosmetic surgery can make someone happier with the way they look, then they should try it  
(ACS5)

6. If I could have a surgical procedure done for free I would consider trying cosmetic surgery  
(ACS6)

7. If I knew there would be no negative side effects or pain, I would like to try cosmetic surgery  
(ACS7)

8. I have sometimes thought about having cosmetic surgery  
(ACS8)

9. I would seriously consider having

cosmetic surgery if my partner thought it was a good idea (ACS9)

10. I would never have any kind of plastic surgery (ACS10)

11. I would think about having cosmetic surgery in order to keep looking young (ACS11)

12. If it would benefit my career I would think about having plastic surgery (ACS12)

13. I would seriously consider having cosmetic surgery if I thought my partner would find me more attractive (ACS13)

14. Cosmetic

surgery can be a big benefit to people's self-image (ACS14)

15. If a simple cosmetic surgery procedure would make me more attractive to others, I would think about trying it (ACS15)

End of Block: Acceptance of Cometic Surgery

---

Start of Block: RSES/Selfworth

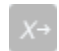

res Please read each statement and indicate how much the statement applied to you **over the past two weeks**. There are no right or wrong answers. Do not spend too much time on any one statement.

|                                                                                       | Strongly Disagree (1) | Disagree (2)          | Agree (3)             | Strongly Agree (4)    |
|---------------------------------------------------------------------------------------|-----------------------|-----------------------|-----------------------|-----------------------|
| 1. I feel that I am a person of worth, at least on an equal plane with others (rses1) | <input type="radio"/> | <input type="radio"/> | <input type="radio"/> | <input type="radio"/> |
| 2. I feel that I have a number of good qualities (rses2)                              | <input type="radio"/> | <input type="radio"/> | <input type="radio"/> | <input type="radio"/> |
| 3. All in all, I am inclined to feel that I am a failure (rses3)                      | <input type="radio"/> | <input type="radio"/> | <input type="radio"/> | <input type="radio"/> |
| 4. I am able to do things as well as most people (rses4)                              | <input type="radio"/> | <input type="radio"/> | <input type="radio"/> | <input type="radio"/> |
| 5. I feel I do not have much to be proud of (rses5)                                   | <input type="radio"/> | <input type="radio"/> | <input type="radio"/> | <input type="radio"/> |
| 6. I take a positive attitude toward myself (rses6)                                   | <input type="radio"/> | <input type="radio"/> | <input type="radio"/> | <input type="radio"/> |
| 7. On the whole, I am satisfied with myself (rses7)                                   | <input type="radio"/> | <input type="radio"/> | <input type="radio"/> | <input type="radio"/> |
| 8. I wish I could have more respect for myself (rses8)                                | <input type="radio"/> | <input type="radio"/> | <input type="radio"/> | <input type="radio"/> |
| 9. I certainly feel useless at times (rses9)                                          | <input type="radio"/> | <input type="radio"/> | <input type="radio"/> | <input type="radio"/> |
| 10. At times I think that I am                                                        | <input type="radio"/> | <input type="radio"/> | <input type="radio"/> | <input type="radio"/> |



no good at all  
(rses10)

11. Please select  
agree. (Q87\_11)

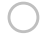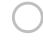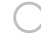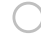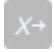

csw Please respond to each of the following statements by selecting your answer using the scale from "1 = Strongly disagree" to "7 = Strongly agree." If you haven't experienced the situation described in a particular statement, please answer how you think you would feel if that situation occurred.

|                                                                               | Strongly disagree<br>(1) | Disagree<br>(2)       | Somewhat disagree<br>(3) | Neutral<br>(4)        | Somewhat agree<br>(5) | Agree<br>(6)          | Strongly agree<br>(7) |
|-------------------------------------------------------------------------------|--------------------------|-----------------------|--------------------------|-----------------------|-----------------------|-----------------------|-----------------------|
| When I think I look attractive, I feel good about myself. (csw1)              | <input type="radio"/>    | <input type="radio"/> | <input type="radio"/>    | <input type="radio"/> | <input type="radio"/> | <input type="radio"/> | <input type="radio"/> |
| My self-esteem is unrelated to how I feel about the way my body looks. (csw2) | <input type="radio"/>    | <input type="radio"/> | <input type="radio"/>    | <input type="radio"/> | <input type="radio"/> | <input type="radio"/> | <input type="radio"/> |
| I don't care if other people have a negative opinion about me. (csw3)         | <input type="radio"/>    | <input type="radio"/> | <input type="radio"/>    | <input type="radio"/> | <input type="radio"/> | <input type="radio"/> | <input type="radio"/> |
| I can't respect myself if others don't respect me. (csw4)                     | <input type="radio"/>    | <input type="radio"/> | <input type="radio"/>    | <input type="radio"/> | <input type="radio"/> | <input type="radio"/> | <input type="radio"/> |
| I don't care what other people                                                | <input type="radio"/>    | <input type="radio"/> | <input type="radio"/>    | <input type="radio"/> | <input type="radio"/> | <input type="radio"/> | <input type="radio"/> |

think of  
me.  
(csw5)

My self-  
esteem is  
influenced  
by how  
attractive  
I think my  
face or  
facial  
features  
are.  
(csw6)

My sense  
of self-  
worth  
suffers  
whenever  
I think I  
don't look  
good.  
(csw7)

What  
others  
think of  
me has  
no effect  
on what I  
think  
about  
myself.  
(csw8)

My self-  
esteem  
does not  
depend  
on  
whether  
or not I  
feel  
attractive.  
(csw9)

My self-  
esteem  
depends  
on the

opinions  
others  
hold of  
me.  
(csw10)

End of Block: RSES/Selfworth

---

Start of Block: Demographics

age What is your age?

▼ 18 (1) ... 100 (83)

---

gender What is your gender identity?

Male (1)

Female (2)

Non-binary (5)

Other (6) \_\_\_\_\_

---

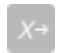

country In which country do you currently reside?

▼ Afghanistan (1) ... Zimbabwe (1357)

---

*Display This Question:*

*If List of Countries = United States of America*

state In which state do you currently reside?

▼ Alabama (1) ... I do not reside in the United States (53)

---

ethnicity Do you identify as Hispanic or Latino?

Yes (1)

No (2)

---

race Choose one or more races you identify as:

White (1)

Black or African American (2)

Native American or Alaskan Native (3)

Asian (4)

Native Hawaiian or Pacific Islander (5)

Other (6) \_\_\_\_\_

---

education What is the highest level of school you have completed or the highest degree you have received?

- Less than high school degree (1)
- High school graduate (high school diploma or equivalent including GED) (2)
- Some college but no degree (3)
- Associate degree in college (2-year) (4)
- Bachelor's degree in college (4-year) (5)
- Master's degree (6)
- Doctoral degree (PhD) (7)
- Professional degree (JD, MD) (8)

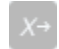

income Approximate household income

▼ (1) ... >200K (7)

---

cosmhx\_self Have you undergone cosmetic surgery or procedures before?

- Yes (1)
- No (2)

---

*Display This Question:*

*If Have you undergone cosmetic surgery or procedures before? = Yes*

Q121 Did you obtain cosmetic surgery or procedures after March 2020?

- Yes (1)
- No (2)

---

*Display This Question:*

*If Have you undergone cosmetic surgery or procedures before? = Yes*

Q120 How much did seeing yourself on video affect your decision to get cosmetic surgery/procedure?

0 = not at all

100 = very much so

0 10 20 30 40 50 60 70 80 90 100

Effect of seeing yourself on decision ()

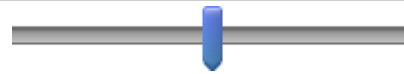

---

*Display This Question:*

*If Have you undergone cosmetic surgery or procedures before? = Yes*

Q70 What surgery or surgeries have you undergone?

- Arm lift (brachioplasty) (29)
- Breast enhancement with implants (augmentation) (1)
- Breast lift (mastopexy ) (2)
- Breast reduction (3)
- Brazilian butt lift (4)
- Brow lift (26)
- Cheek implant (does NOT involve filler) (5)
- Chin augmentation (6)
- Ear surgery (7)
- Eyelid surgery (8)
- Forehead surgery (31)
- Facelift (9)
- Jaw reshaping (25)
- Hair transplantation (10)
- Hairline surgery (30)
- Lip augmentation (11)
- Liposuction (13)
- Nose reshaping (rhinoplasty) (14)



- Neck lift (27)
  - Tummy tuck (abdominoplasty) (15)
  - Other (please specify): (16)
- 
- None (32)

*Display This Question:*

*If Have you undergone cosmetic surgery or procedures before? = Yes*

Q71 What procedure or procedures have you undergone?

- Botox or other neurotoxin (1)
  - Chemical peel (2)
  - Laser hair removal (3)
  - Laser skin resurfacing (4)
  - Cellulite treatment (Velosmooth, Endermology) (5)
  - Injection lipolysis (Kybella) (6)
  - Microdermabrasion (7)
  - Non-invasive fat reduction (Coolsculpting, Liposonix) (8)
  - Non-surgical skin-tightening (Pelleve, Thermage, Ulthera) (9)
  - Sclerotherapy (10)
  - Soft tissue fillers (including fillers for nose jobs, lip fillers) (11)
  - Other (please specify): (12)
- 
- None (14)

cosmhx\_else Do you know someone personally who has undergone cosmetic procedures or surgery?

- Yes (1)
- No (2)

*Display This Question:*

*If Do you know someone personally who has undergone cosmetic procedures or surgery? = Yes*

Q73 What is your relationship with the person who has undergone cosmetic procedures or surgery?

- Family member (1)
- Friend (2)
- Acquaintance (3)

---

*Display This Question:*

*If Do you know someone personally who has undergone cosmetic procedures or surgery? = Yes*

Q122 What surgery or surgeries have you undergone?

- Arm lift (brachioplasty) (29)
- Breast enhancement with implants (augmentation) (1)
- Breast lift (mastopexy ) (2)
- Breast reduction (3)
- Brazilian butt lift (4)
- Brow lift (26)
- Cheek implant (does NOT involve filler) (5)
- Chin augmentation (6)
- Ear surgery (7)
- Eyelid surgery (8)
- Forehead surgery (31)
- Facelift (9)
- Jaw reshaping (25)
- Hair transplantation (10)
- Hairline surgery (30)
- Lip augmentation, surgical (11)
- Liposuction (13)
- Nose reshaping (rhinoplasty) (14)

- Neck lift (27)
  - Tummy tuck (abdominoplasty) (15)
  - Other (please specify): (16)
- 
- None (32)

*Display This Question:*

*If Do you know someone personally who has undergone cosmetic procedures or surgery? = Yes*

Q123 What procedure or procedures have you undergone?

- Botox or other neurotoxin (1)
  - Chemical peel (2)
  - Laser hair removal (3)
  - Laser skin resurfacing (4)
  - Cellulite treatment (Velosmooth, Endermology) (5)
  - Injection lipolysis (Kybella) (6)
  - Microdermabrasion (7)
  - Non-invasive fat reduction (Coolsculpting, Liposonix) (8)
  - Non-surgical skin-tightening (Pelleve, Thermage, Ulthera) (9)
  - Sclerotherapy (10)
  - Soft tissue fillers (including fillers for nose jobs, lip fillers) (11)
  - Other (please specify): (12)
- 
- None (14)

End of Block: Demographics

---

Start of Block: Present ID

Q95 This is your ID: `{e://Field/Random%20ID}`

Please copy this value and paste it into MTurk to receive credit for your work.

**YOU MUST HIT NEXT TO SUBMIT YOUR SURVEY - otherwise, you will not be compensated.**

Thank you!

End of Block: Present ID

---
